# Supplementary material for: B cells expressing the transcription factor T-bet drive lupus-like autoimmunity
Source: JCI journal article supplement (doi:10.1172/jci91250), 2017-02-26

## SUPPLEMENTAL FIGURE LEGENDS

**Figure S1. Development of proteinuria over time.** Proteinurea scores were taken once a month over 12 month for SLE1,2,3 x T-bet<sup>fl/fl</sup> x CD19<sup>cre/wt</sup> (red), and SLE1,2,3 x T-bet<sup>fl/fl</sup> x CD19<sup>wt/wt</sup> mice as described in Methods. Percentage of mice with high (over 100 mg/dL) proteinurea is shown (n=10 mice per group).

**Figure S2. Delayed appearance of GC B cell, preplasmablasts and activated T cells in SLE1,2,3 x T-bet<sup>fl/fl</sup> x CD19<sup>cre/wt</sup> mice.** 10-12 month old SLE1,2,3 x T-bet<sup>fl/fl</sup> x CD19<sup>cre/wt</sup> mice were analyzed for the presence of (A) GC B cells, (B) early plasmablasts, (C) activated/memory CD4 T cells, (D) activated/memory CD8 T cells, (E) IFN $\gamma$  producing CD4 T cells, (F) IFN $\gamma$  CD8 T cells. Representative FACS plots are shown. The data are representative of at least three independent experiments (n  $\geq$  5)

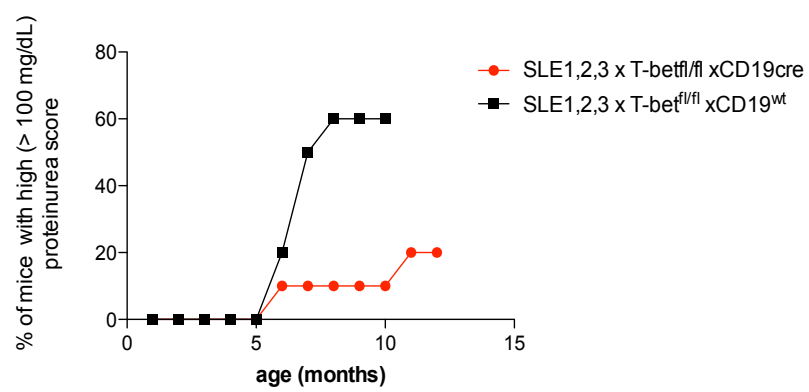

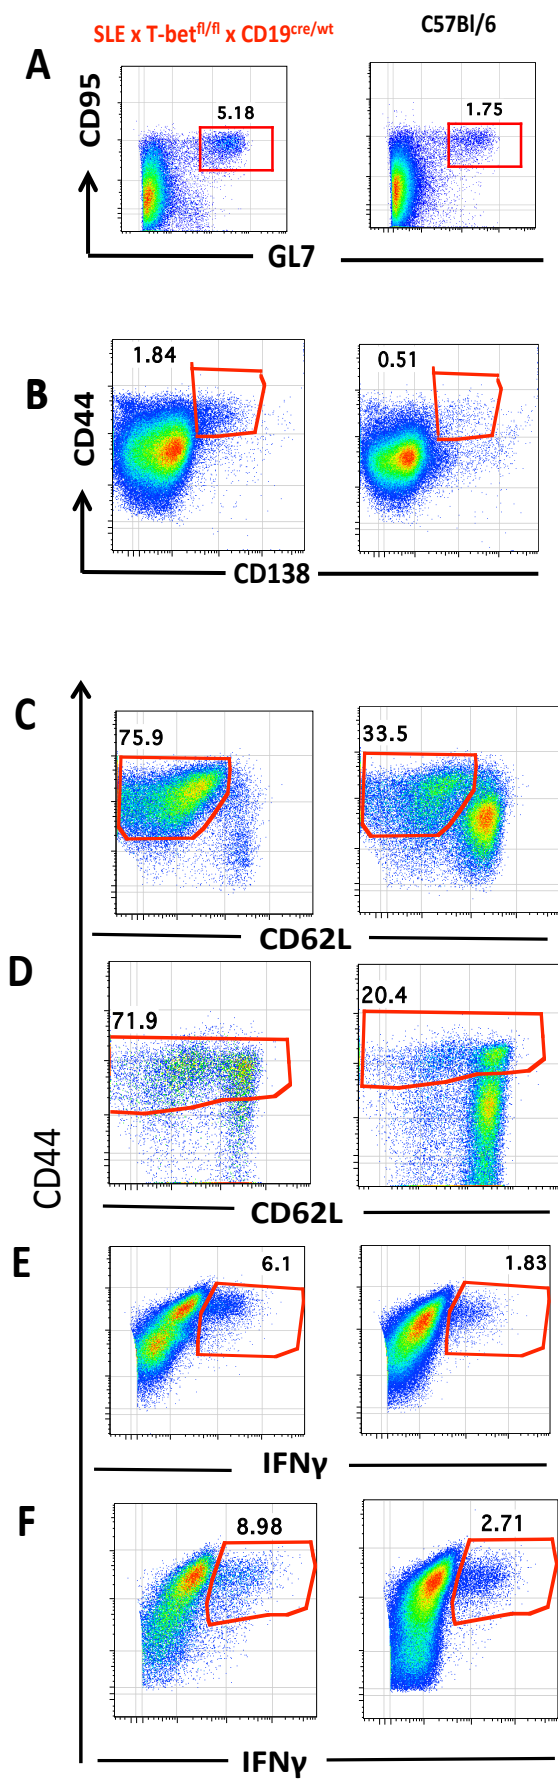

Supplement: sd1 [file 1]
